# Supplementary material for: Silica nanoparticles enhance wheat resistance to fusarium head blight through modulating antioxidant enzyme activities and salicylic acid accumulation
Source: Royal Society of Chemistry journal article supplement (doi:10.1039/d4en00435c), 2024-01-01
Supplement: d4en00435c1.xlsx [file d4en00435c1.xlsx]

## Sheet: Table S1
The primer sequences for qRT-PCR.
PerimerID	Forward	Reverse
TaActin	ATGGAAGCTGCTGGAATCCAT	CCTTGCTCATACGGTCAGCAATAC
TaPR1a	GCGGTGAAGCTGTGGGTGGA	GGGCTCGTAGTTGCAGGTGATGA
TaPR2	GTGGTGCAGCTCTACAGGTCCAA	TTACCGATGTCGAGGATGAGGC
TaPR5	GCTCTTCCTCCTCCTGGCTGTTT	CATATCCTCCCGGCTTTGGTG
TaPR9	GAGATTCCACAGATGCAAACGAG	GGAGGCCCTTGTTTCTGAATG
TaPAL	CGTCAAGAGCTGTGTGAAGATGG	GGTAGTTGGAGCTGCAAGGGTC
TaNOX	ATGTTCGGCAACTTGGTGACT	CGTCTGCTCTAAGAAGACCACTTTT
TaSOD	CCGAGGTCTGGAACCATCAC	AGCCGAAATCCTTCTCGATCT
TaCAT1	GCCCAAGTGCTCCCACCACAACA	TGAGGGTGCGGGAGGGGATG
TaSCS	GAGTTCACCCACGGGAAGC	ATTGTCGCAACGACGCATTC
